RETRACTION

# Retraction: Ensemble learning for multi-class COVID-19 detection from big data

The *PLOS One* Editors

The *PLOS One* Editors retract this article [1] due to concerns about peer review integrity, authorship, and adherence to the journal's publication requirements on reporting and data availability. We regret that the issues were not addressed prior to the article's publication.

SK, AS, MUT, and MB did not agree with the retraction. BQ either did not respond directly or could not be reached.

## Reference

1. Kaleem S, Sohail A, Tariq MU, Babar M, Qureshi B. Ensemble learning for multi-class COVID-19 detection from big data. *PLoS One*. 2023;18(10): e0292587. <https://doi.org/10.1371/journal.pone.0292587> PMID: [37819992](https://pubmed.ncbi.nlm.nih.gov/37819992/)

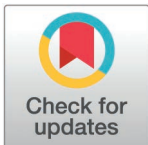

## OPEN ACCESS

**Citation:** The *PLOS One* Editors (2025) Retraction: Ensemble learning for multi-class COVID-19 detection from big data. *PLoS ONE* 20(4): e0321416. <https://doi.org/10.1371/journal.pone.0321416>

**Published:** April 7, 2025

**Copyright:** © 2025 The *PLOS One* Editors. This is an open access article distributed under the terms of the [Creative Commons Attribution License](https://creativecommons.org/licenses/by/4.0/), which permits unrestricted use, distribution, and reproduction in any medium, provided the original author and source are credited.
